# Supplementary material
Source: Springer Nature journal article supplement (https://www.springermedizin.de/resource/supplementary/12931_2013_1595_MOESM4_ESM.pdf/10243340)

A

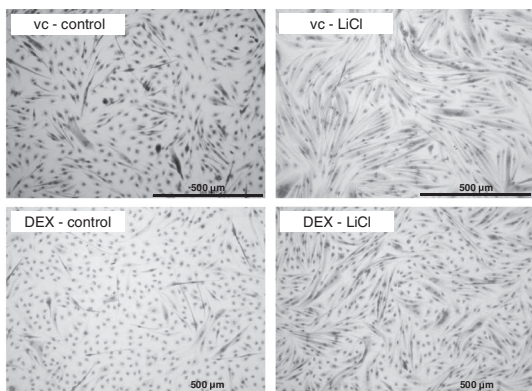

B

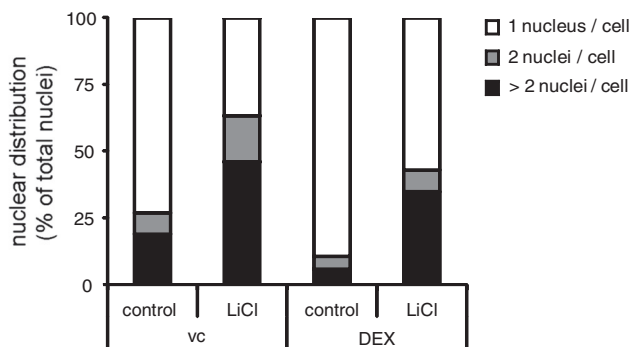

C

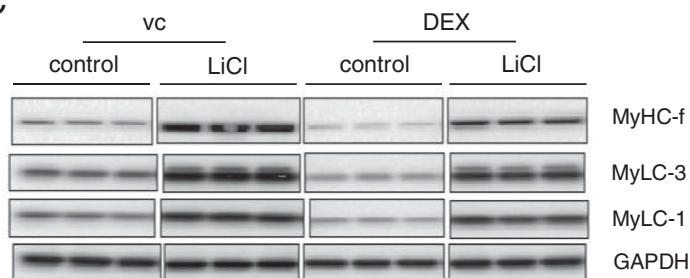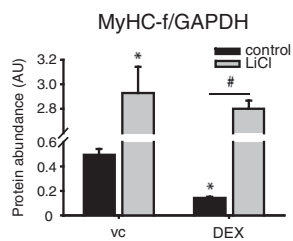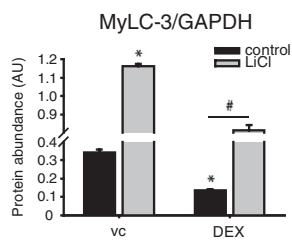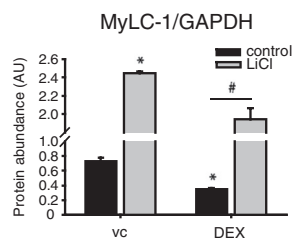

D

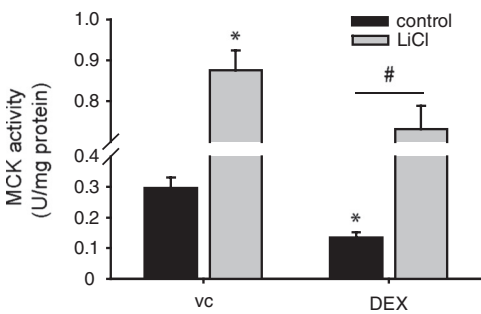

E

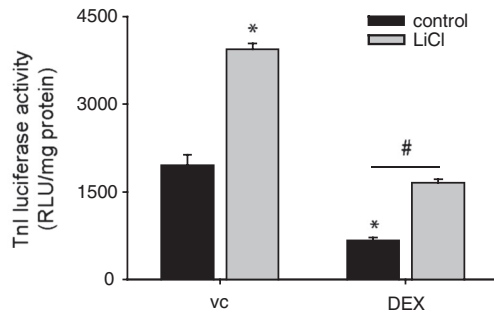

Supplement: MOESM4 [file 10243340]
